# Supplementary material for: TGF-β-driven LIF expression influences neutrophil extracellular traps (NETs) and contributes to peritoneal metastasis in gastric cancer
Source: Cell Death Dis. 2024 Mar 15;15(3):218. doi: 10.1038/s41419-024-06594-w (PMC10943116; doi:10.1038/s41419-024-06594-w)
Supplement: Supplementary file 1 — Supplementary files [file 41419_2024_6594_MOESM1_ESM.pdf]

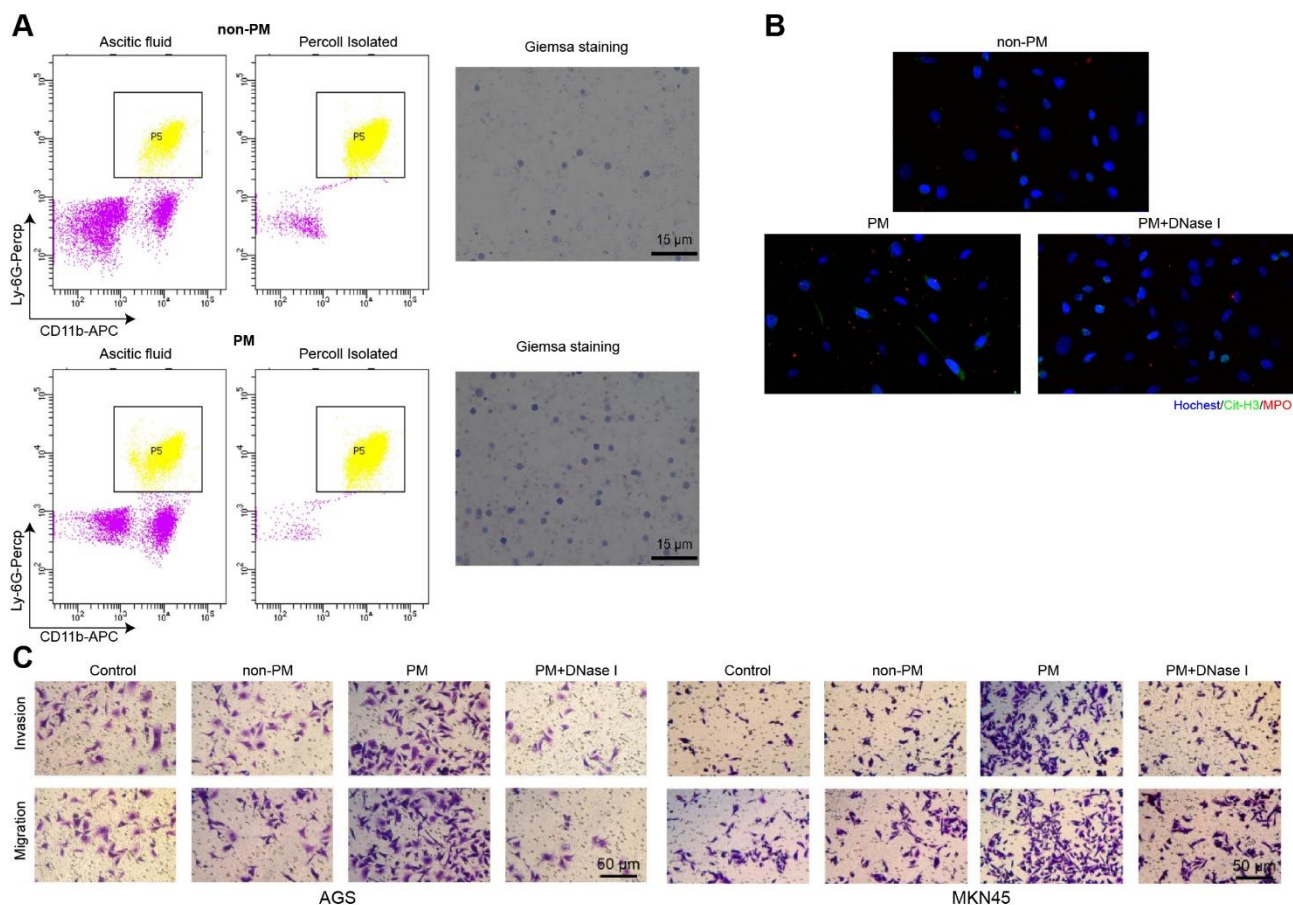

**Fig. S1 Neutrophil NET formation affects GC cell proliferation, invasion, migration, and EMT in vitro.**

**Note:** (A) Flow cytometry and Giemsa staining were used to verify the presence of neutrophils isolated from the ascites of non-PM group (n=12) and PM group (n=18) GC patients, with a scale bar of 50  $\mu$ m; (B) Immunofluorescence co-staining was performed to assess the formation of NETs, with Cit-H3 labeled in green and MPO labeled in red, while the cell nuclei were labeled in blue; (C) Transwell assay was used to evaluate the migration and invasion of GC cells after co-culture. Cell experiments should be repeated at least three times.

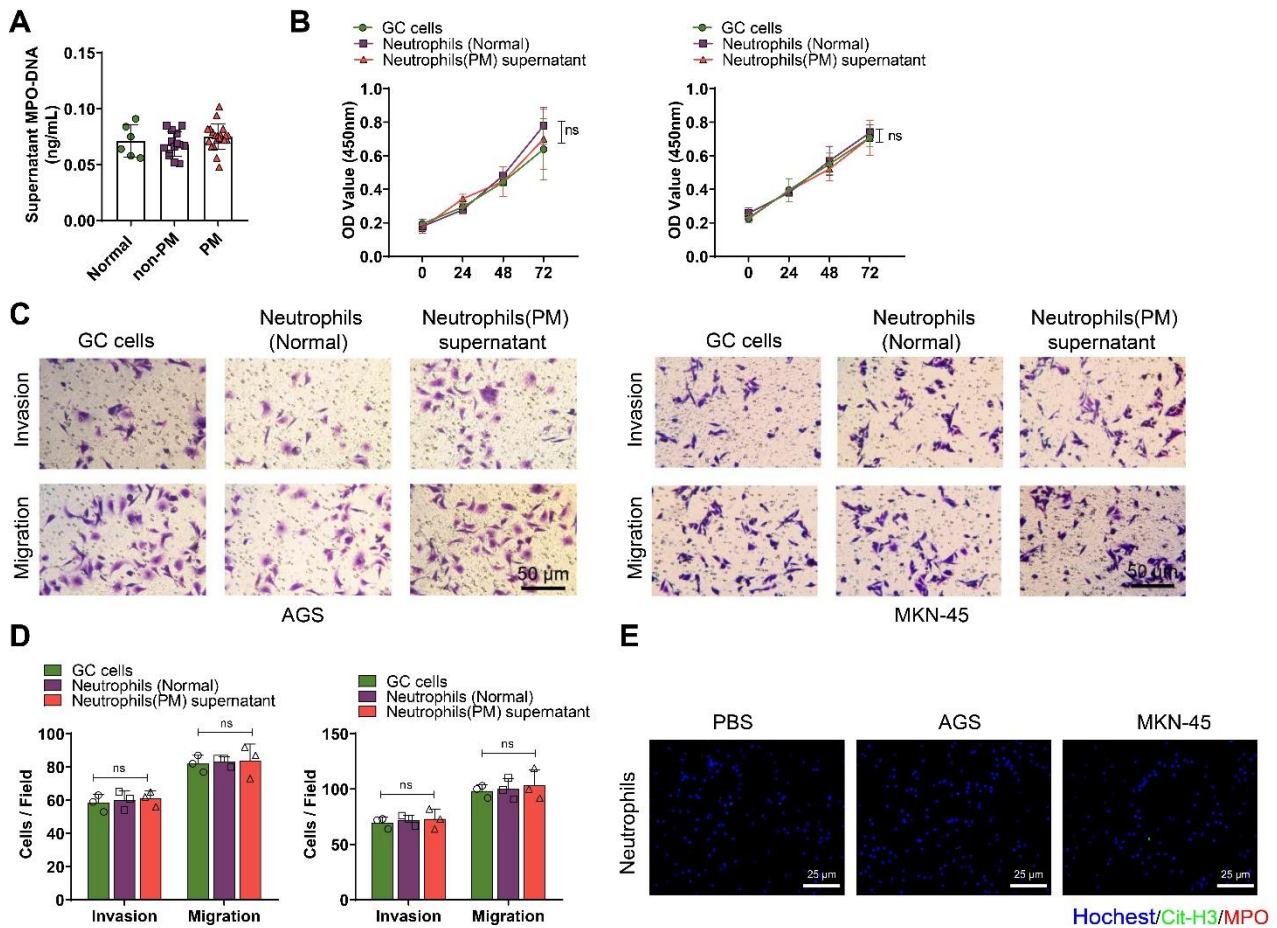

**Fig. S2** The impact of NET-deficient neutrophils on the proliferation, invasion, and migration of GC cells.

**Note:** (A) ELISA detects the levels of MPO in the supernatant of neutrophil cultures from different sources; (B) CCK8 detects the proliferative ability of GC cells; (C) Transwell detects the migration and invasion of GC cells; (D) Transwell detects the migration and invasion ability of GC cells and presents the statistical data in a graph; (E) Immunofluorescence co-staining detects the levels of Cit-H3 and MPO in neutrophils and GC cells co-cultured, with nucleus labeled in blue, Cit-H3 labeled in green, and MPO labeled in red. Ns represents no significant difference, and the cell experiment should be repeated thrice.

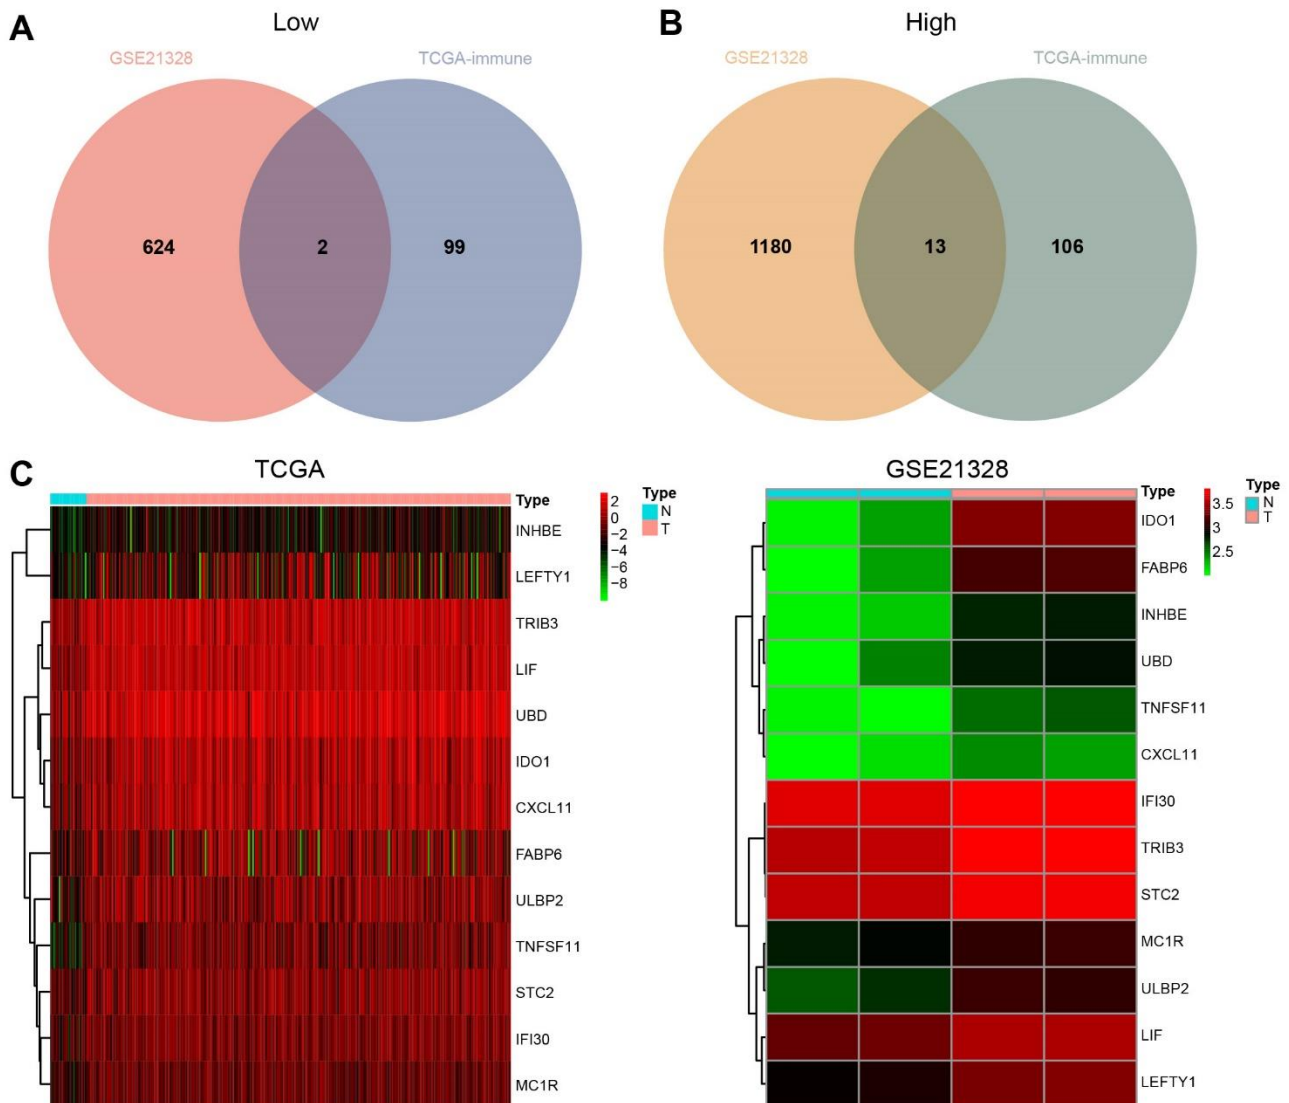

**Fig. S3 Differential gene analysis of GEO database chip GSE21328 and TCGA database GC immune-related differential genes.**

**Note:** (A) The intersection of the Venn diagram of downregulated genes in the GEO database GSE21328 (two samples from the highly metastatic GC cell line MKN-45-P and its parental cell line MKN-45) and the TCGA database GC immune-related downregulated genes (Normal: n=32, Tumor: n=327); (B) The intersection Venn diagram of downregulated genes in the GEO database GSE21328 (two samples from the highly metastatic GC cell line MKN-45-P and its parental cell line MKN-45) and the TCGA database GC immune-related upregulated genes (Normal: n=32, Tumor: n=327); (C) Expression heatmap of the 13 intersecting upregulated genes in the TCGA database and the GSE21328 chip dataset.

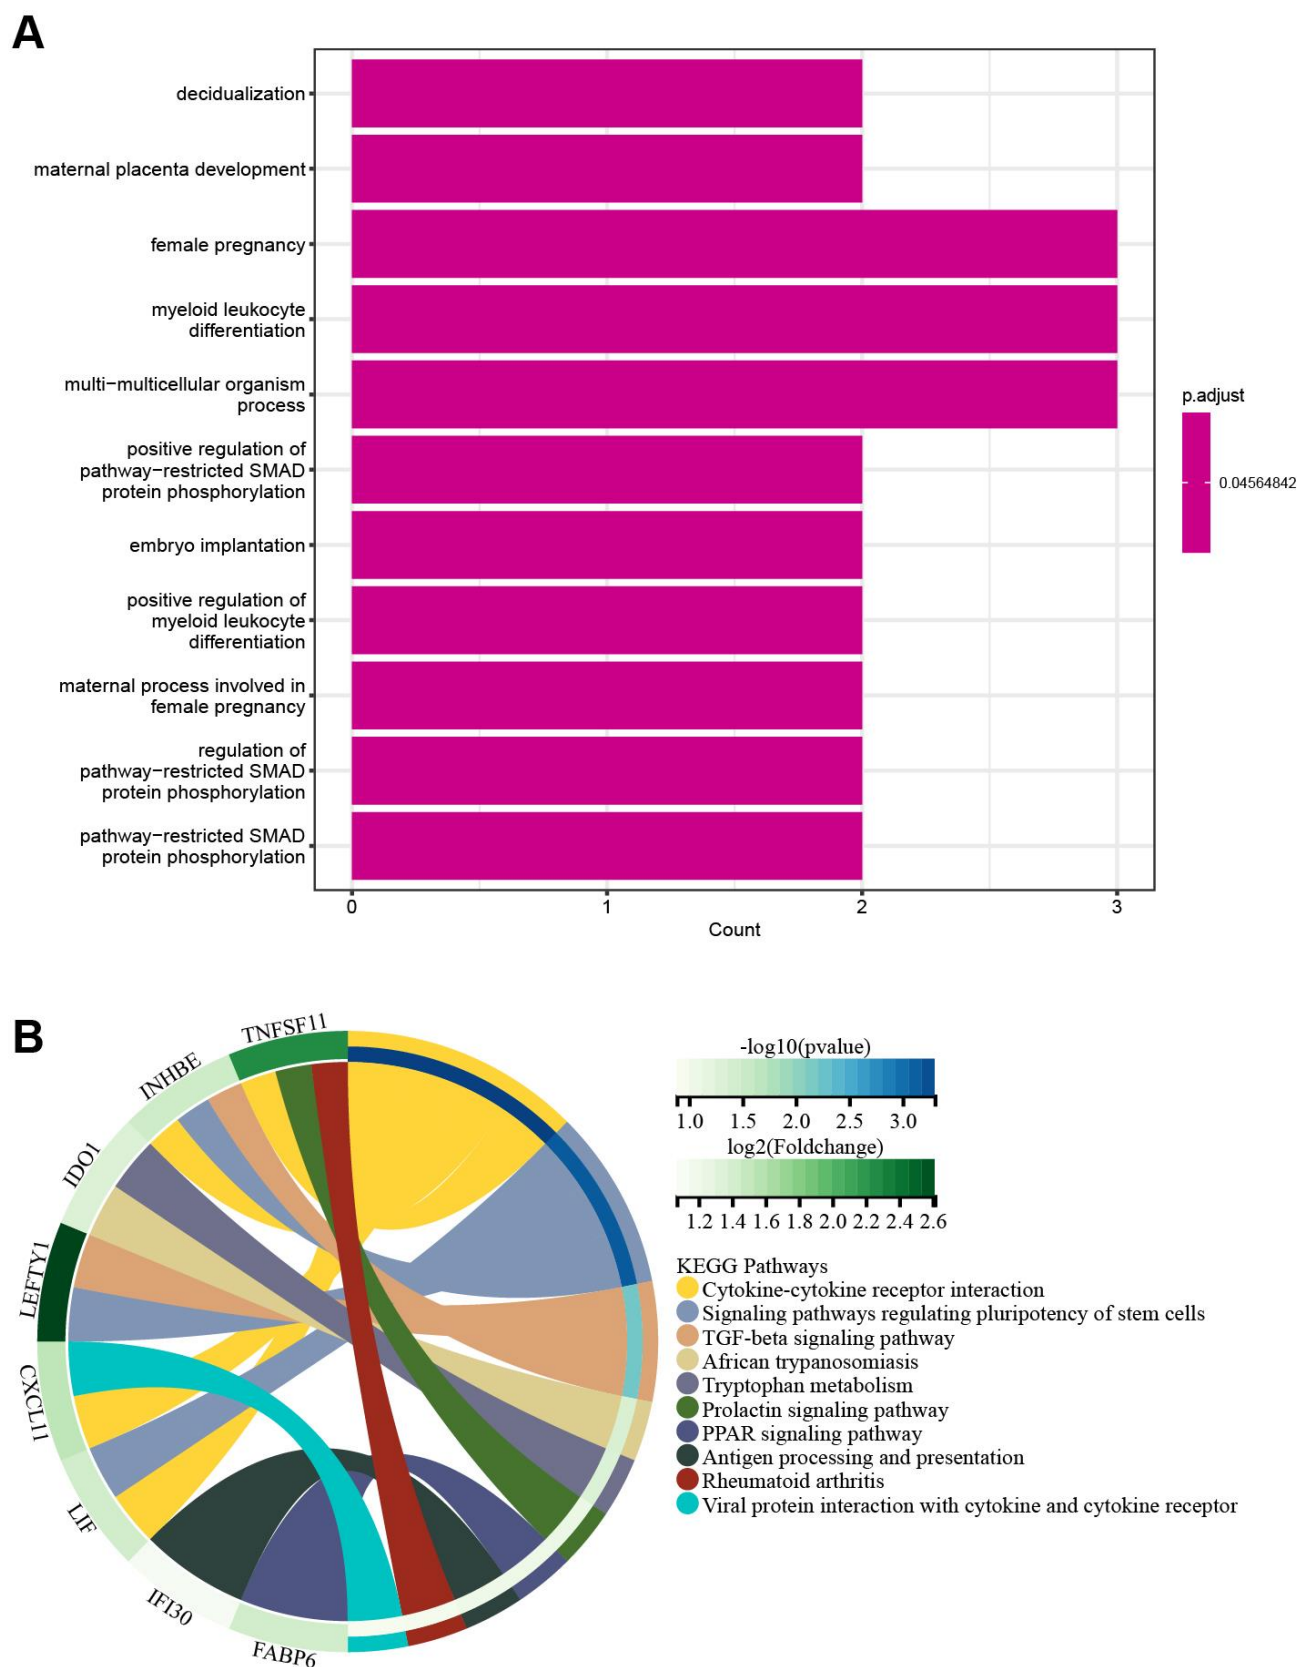

**Fig. S4 Functional enrichment analysis of candidate target genes.**

**Note: (A) Bar chart of GO-BP functional analysis of 13 differentially upregulated intersection genes; (B) Circle diagram of KEGG functional enrichment analysis of 13 differentially upregulated intersection genes.**



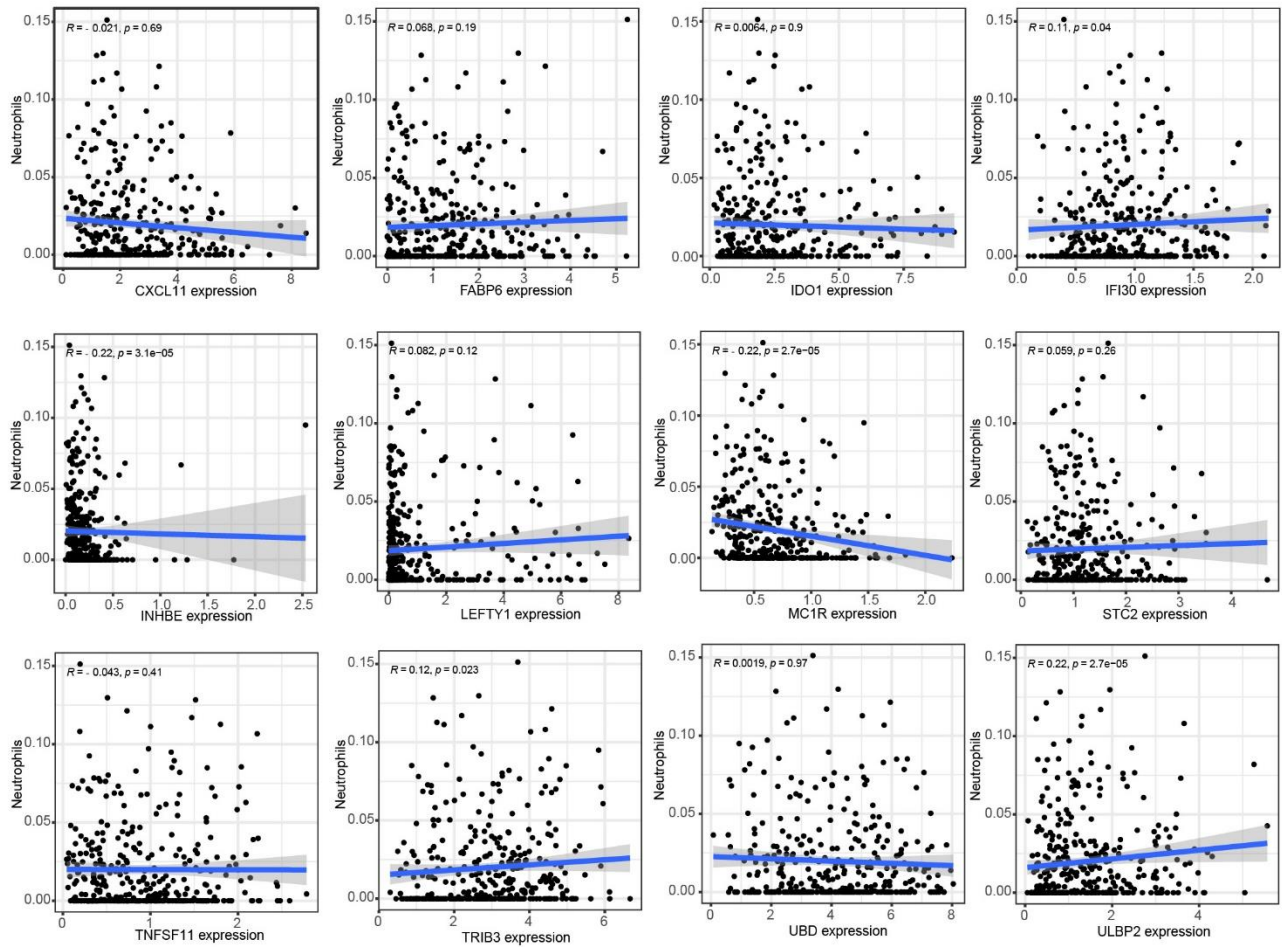

**Fig. S5 Correlation analysis between candidate target genes and neutrophil infiltration.**  
**Note: We used CIBERSORT analysis to analyze the correlation between neutrophil infiltration and key genes in gastric cancer patients from the TCGA database.**

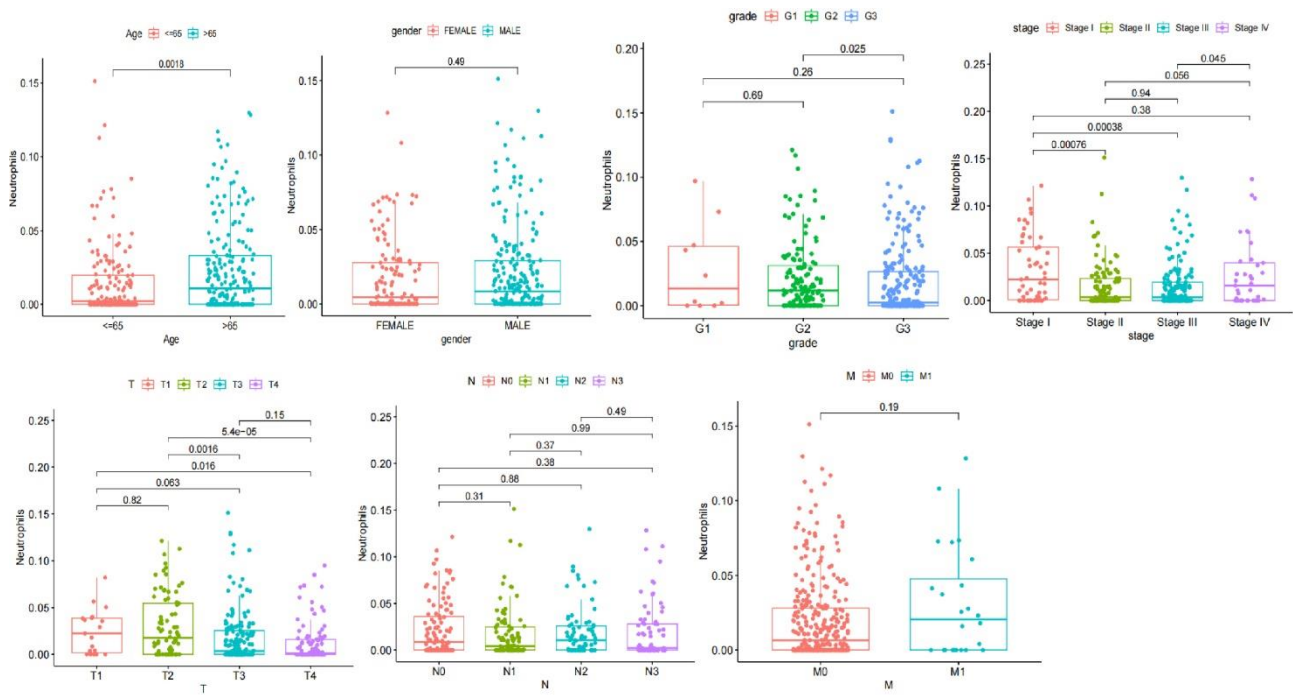

**Fig. S6. Clinical correlation analysis of neutrophil infiltration.**

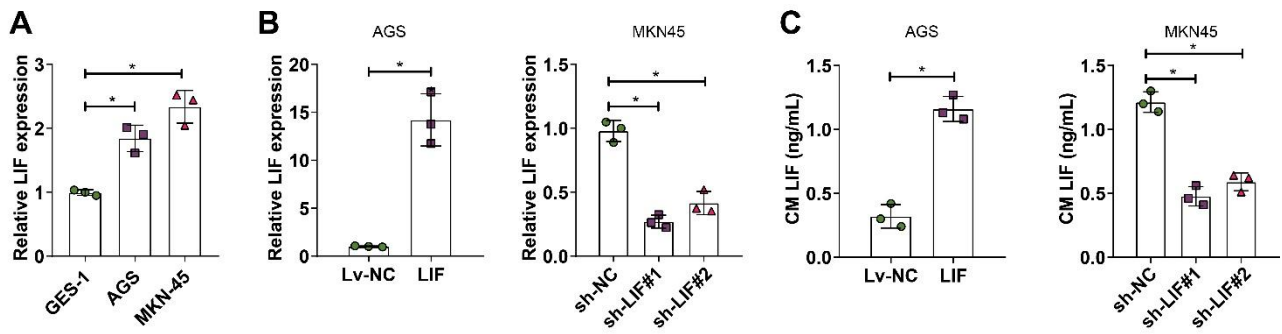

**Fig. S7 Differential expression of LIF in GC cells.**

**Note:** (A) RT-qPCR was used to detect the expression levels of LIF mRNA in GES-1 and GC cells;(B) RT-qPCR was used to detect the expression levels of LIF mRNA in GC cells after treatment with lentivirus;(C) ELISA was used to detect the levels of LIF in the culture medium of GC cells after treatment with lentivirus.

**\*P<0.05, cell experiments were repeated at least three times.**

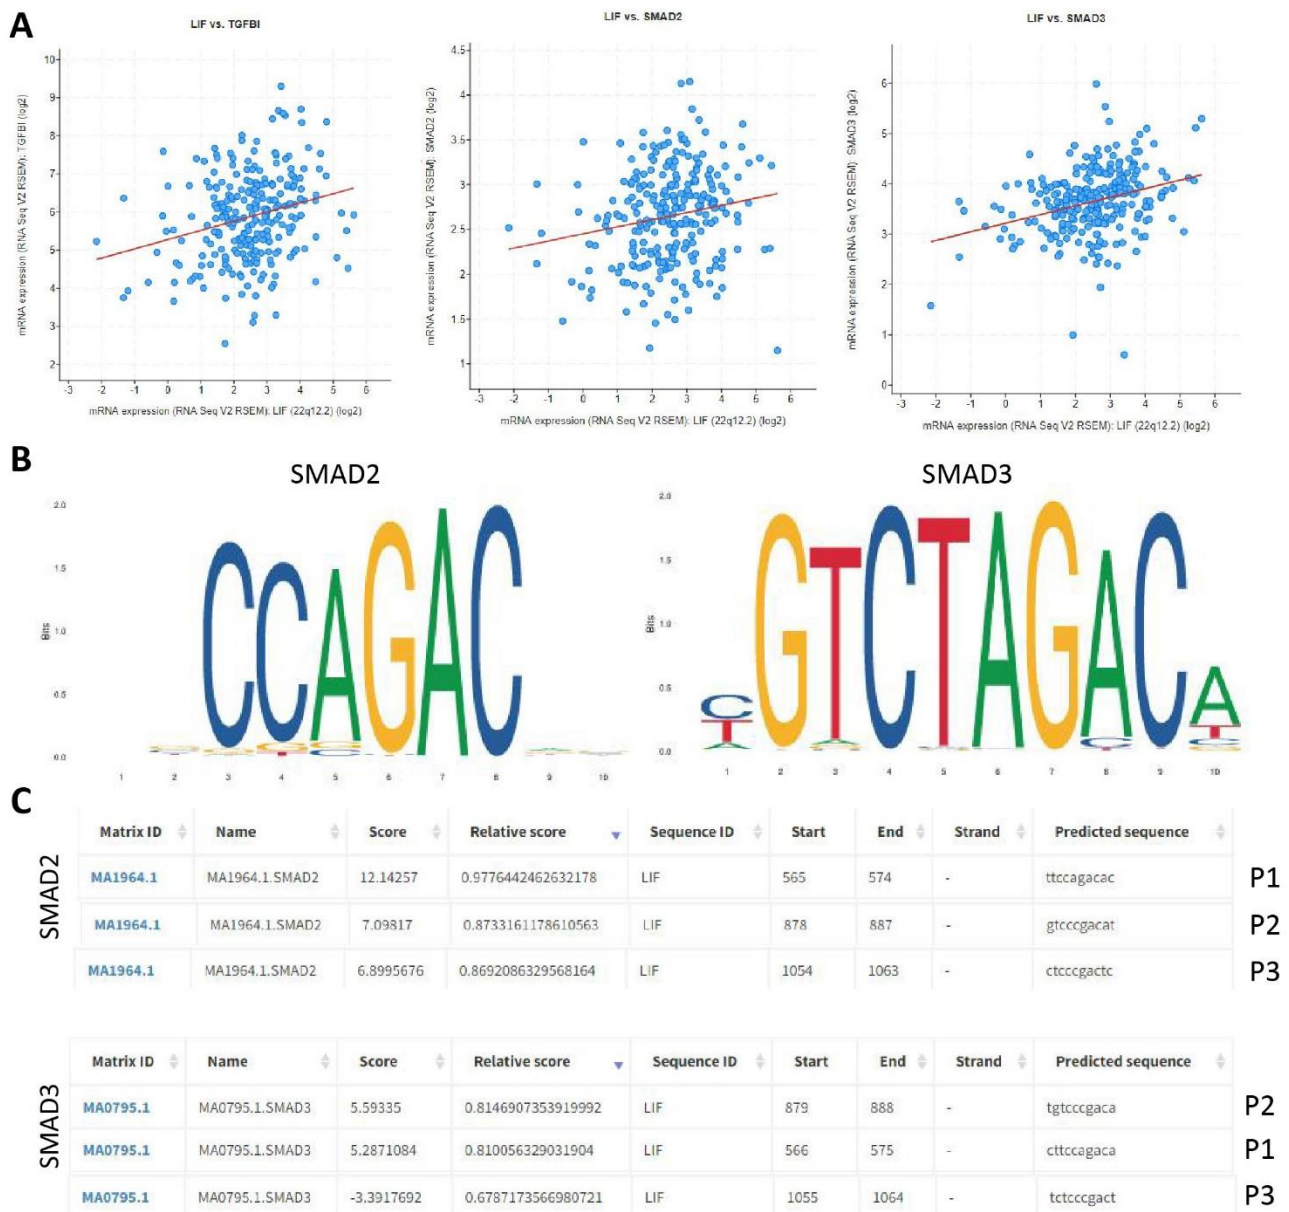

**Fig. S8 Predicted transcriptional regulation of LIF by the TGF- $\beta$ /Smad signaling axis.**  
**Note: (A)** Correlation analysis of LIF and TGF- $\beta$ , Smad2, and Smad3 in GC tissue, N=30; **(B)** Transcription factor Smad2 and Smad3 transcription regulatory site logo; **(C)** JASPAR predicted binding sites of Smad2/3 in the LIF promoter region.

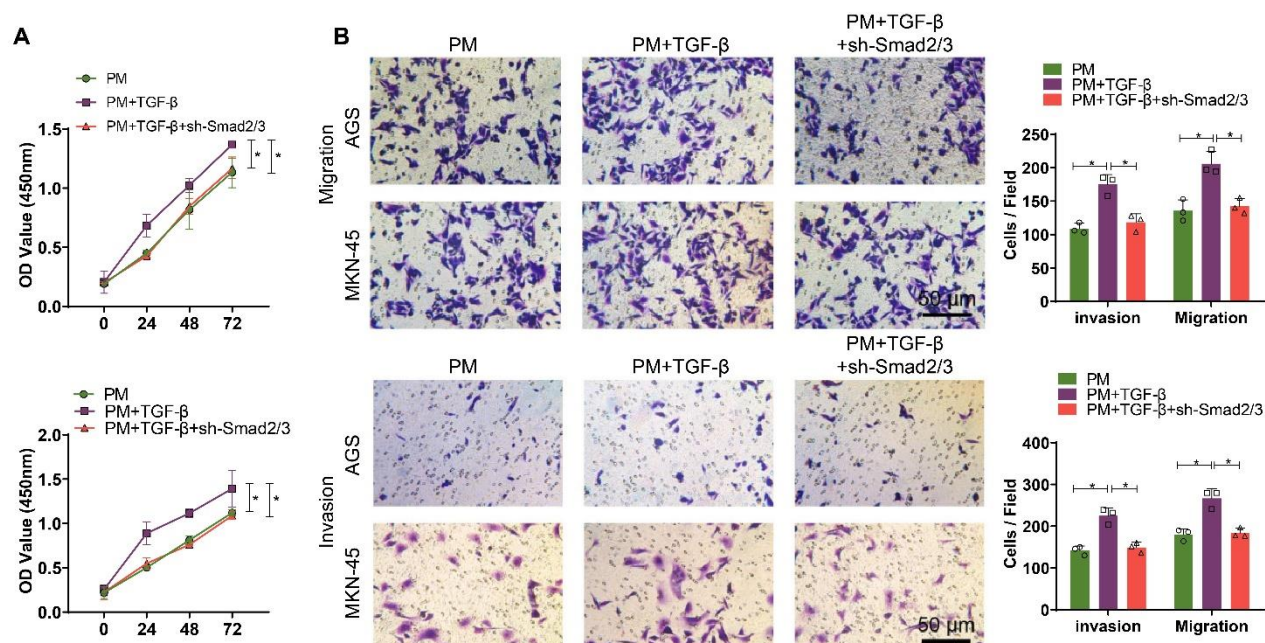

**Fig. S9** The impact of the TGF- $\beta$ /Smad/LIF signaling axis on GC cell proliferation, invasion, and migration.

**Note:** (A) After the knockdown of Smad2/3 by shRNA lentivirus for 3 h, GC cells were treated with 10 ng/mL TGF- $\beta$ 1, then co-cultured with neutrophils derived from peritoneal macrophages. The proliferation ability of GC cells was detected by CCK8 assay; (B) GC cells' migration and invasion ability were assessed using Transwell assay after co-culturing with neutrophils. \* $P < 0.05$ , cell experiments were repeated at least three times.

**Table S1 The clinicopathological characteristics of patients with GC**

| <b>Baseline characteristics</b> | <b>GC (n = 30)</b> |
|---------------------------------|--------------------|
| <b>Gender</b>                   |                    |
| Male                            | 17                 |
| Female                          | 13                 |
| <b>Age (years)</b>              |                    |
| < 65                            | 14                 |
| ≥ 65                            | 16                 |
| <b>Tumor size</b>               |                    |
| < 5 cm                          | 16                 |
| ≥ 5 cm                          | 14                 |
| <b>Tumor stage</b>              |                    |
| T1 + T2                         | 12                 |
| T3 + T4                         | 18                 |
| <b>Histological grade</b>       |                    |
| Well/moderate                   | 17                 |
| Poor/NS                         | 13                 |
| <b>Peritoneal metastasis</b>    |                    |
| Negative                        | 12                 |
| Positive                        | 18                 |
| <b>Clinical stages</b>          |                    |
| I + II                          | 13                 |
| III + IV                        | 17                 |

**Table S2 shRNA sequences**

| <b>shRNA (sh-)</b> | <b>Sequence (5'-3')</b>      |
|--------------------|------------------------------|
| <b>sh-NC</b>       | <b>CCTAAGGTTAAGTCGCCCTCG</b> |
| <b>sh-LIF#1</b>    | <b>GCAGTGCCAATGCCCTCTTA</b>  |
| <b>sh-LIF#2</b>    | <b>GAACCAGATCAGGAGCCAACT</b> |
| <b>sh-Smad2</b>    | <b>GCACTTGCTCTGAAATTTG</b>   |
| <b>sh-Smad3</b>    | <b>AATGGTGCGAGAAGGCGGTCA</b> |

**Table S3 Primer sequences of ChIP-qPCR**

| <b>Gene</b>   | <b>Sequence (5'-3')</b>                                                       |
|---------------|-------------------------------------------------------------------------------|
| <b>LIF-P1</b> | <b>Forward: GAAAACTGCCGGCATCTGAG</b><br><b>Reverse: GCCACACCCCTATATCTCACC</b> |
| <b>LIF-P2</b> | <b>Forward: TGGGATGCTGGGACGAAC</b><br><b>Reverse: TAGACGCTTTTCCAGGGCTC</b>    |
| <b>LIF-P3</b> | <b>Forward: TGCGCTAGGTGAGATATAGGG</b><br><b>Reverse: CCCTGACTCCATGCCTTCTC</b> |

**Table S4 The primer sequence for RT-qPCR**

| <b>Gene</b>       | <b>Sequence</b>                                                                               |
|-------------------|-----------------------------------------------------------------------------------------------|
| <b>LIF</b>        | <b>Forward: 5'-CCAACGTGACGGACTTCCC-3'</b><br><b>Reverse: 5'-TACACGACTATGCGGTACAGC-3'</b>      |
| <b>E-cadherin</b> | <b>Forward: 5'-ATTTTTCCTCGACACCCGAT-3'</b><br><b>Reverse: 5'-TCCCAGGCGTAGACCAAGA-3'</b>       |
| <b>Vimentin</b>   | <b>Forward: 5'-TGCCGTTGAAGCTGCTAACTA-3'</b><br><b>Reverse: 5'-CCAGAGGGAGTGAATCCAGATTA-3'</b>  |
| <b>Snail</b>      | <b>Forward: 5'-TGCCCTCAAGATGCACATCCGA-3'</b><br><b>Reverse: 5'-GGGACAGGAGAAGGGCTTCTC-3'</b>   |
| <b>Twist</b>      | <b>Forward: 5'-GCCAGGTACATCGACTTCCTCT-3'</b><br><b>Reverse: 5'-TCCATCCTCCAGACCGAGAAGG-3'</b>  |
| <b>N-cadherin</b> | <b>Forward: 5'-CCTCCAGAGTTTACTGCCATGAC-3'</b><br><b>Reverse: 5'-GTAGGATCTCCGCCACTGATTC-3'</b> |
| <b>GAPDH</b>      | <b>Forward: 5'-CTGGGCTACACTGAGCACC-3'</b><br><b>Reverse: 5'-AAGTGGTCGTTGAGGGCAATG-3'</b>      |

**Table S5 KEGG and GO enrichment analysis of the 13 candidate target genes**

| <b>ID</b>  | <b>Description</b>                                                     | <b>GeneRatio</b> | <b>BgRatio</b> | <b><i>p</i> value</b> | <b><i>p</i>.adjust</b> | <b><i>q</i> value</b> | <b>geneID</b>   | <b>Count</b> |
|------------|------------------------------------------------------------------------|------------------|----------------|-----------------------|------------------------|-----------------------|-----------------|--------------|
| GO:0046697 | decidualization                                                        | 13th Feb.        | 26/18723       | 0.000143              | 0.045648               | 0.028433034           | LIF/STC2        | 2            |
| GO:0001893 | maternal placenta development                                          | 13th Feb.        | 35/18723       | 0.000261              | 0.045648               | 0.028433034           | LIF/STC2        | 2            |
| GO:0007565 | female pregnancy                                                       | 13th Mar.        | 193/18723      | 0.000286              | 0.045648               | 0.028433034           | LIF/STC2/IDO1   | 3            |
| GO:0002573 | myeloid leukocyte differentiation                                      | 13th Mar.        | 208/18723      | 0.000356              | 0.045648               | 0.028433034           | LIF/TNFSF11/UBD | 3            |
| GO:0044706 | multi-multicellular organism process                                   | 13th Mar.        | 220/18723      | 0.00042               | 0.045648               | 0.028433034           | LIF/STC2/IDO1   | 3            |
| GO:0010862 | positive regulation of pathway-restricted SMAD protein phosphorylation | 13th Feb.        | 49/18723       | 0.000514              | 0.045648               | 0.028433034           | INHBE/LEFTY1    | 2            |
| GO:0007566 | embryo implantation                                                    | 13th Feb.        | 53/18723       | 0.000601              | 0.045648               | 0.028433034           | LIF/STC2        | 2            |
| GO:0002763 | positive regulation of myeloid leukocyte differentiation               | 13th Feb.        | 58/18723       | 0.00072               | 0.045648               | 0.028433034           | LIF/TNFSF11     | 2            |
| GO:0060135 | maternal process involved in female pregnancy                          | 13th Feb.        | 62/18723       | 0.000822              | 0.045648               | 0.028433034           | LIF/STC2        | 2            |
| GO:0060393 | regulation of pathway-restricted SMAD protein phosphorylation          | 13th Feb.        | 62/18723       | 0.000822              | 0.045648               | 0.028433034           | INHBE/LEFTY1    | 2            |
| GO:0060389 | pathway-restricted SMAD protein phosphorylation                        | 13th Feb.        | 65/18723       | 0.000903              | 0.045648               | 0.028433034           | INHBE/LEFTY1    | 2            |
| GO:0060395 | SMAD protein signal transduction                                       | 13th Feb.        | 82/18723       | 0.001432              | 0.066367               | 0.041338001           | INHBE/LEFTY1    | 2            |

|                   |                              |                  |                  |                 |                 |                    |                               |          |
|-------------------|------------------------------|------------------|------------------|-----------------|-----------------|--------------------|-------------------------------|----------|
| <b>GO:0051098</b> | <b>regulation of binding</b> | <b>13th Mar.</b> | <b>363/18723</b> | <b>0.001789</b> | <b>0.076513</b> | <b>0.047657946</b> | <b>LIF/TNFSF11/T<br/>RIB3</b> | <b>3</b> |
|-------------------|------------------------------|------------------|------------------|-----------------|-----------------|--------------------|-------------------------------|----------|

**Original western blots**

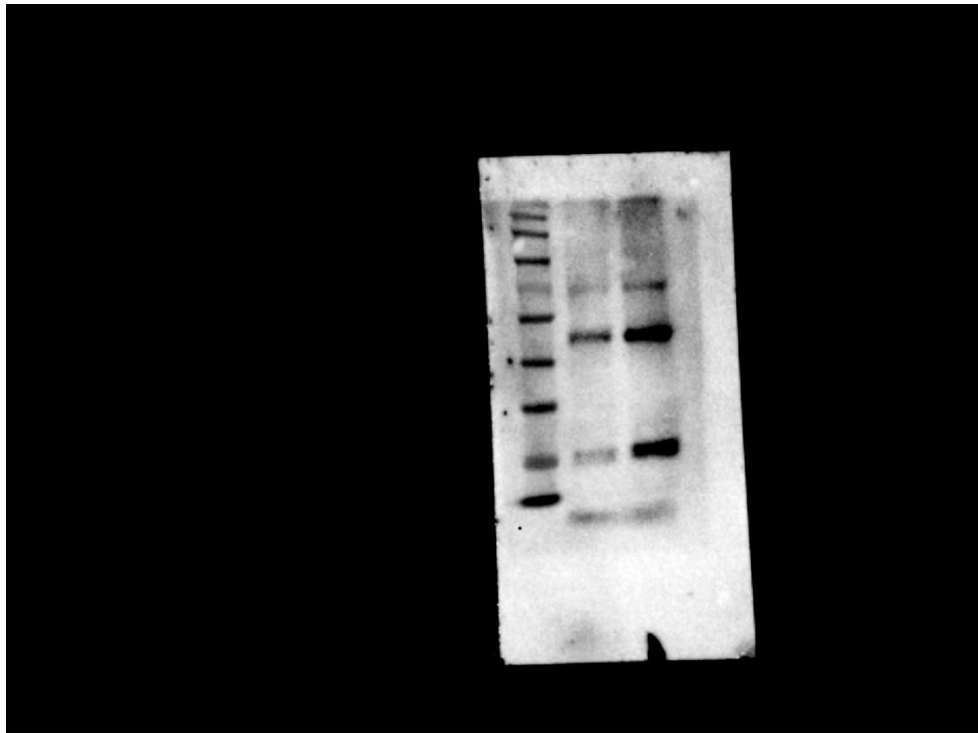

**Figure5C-1-1**

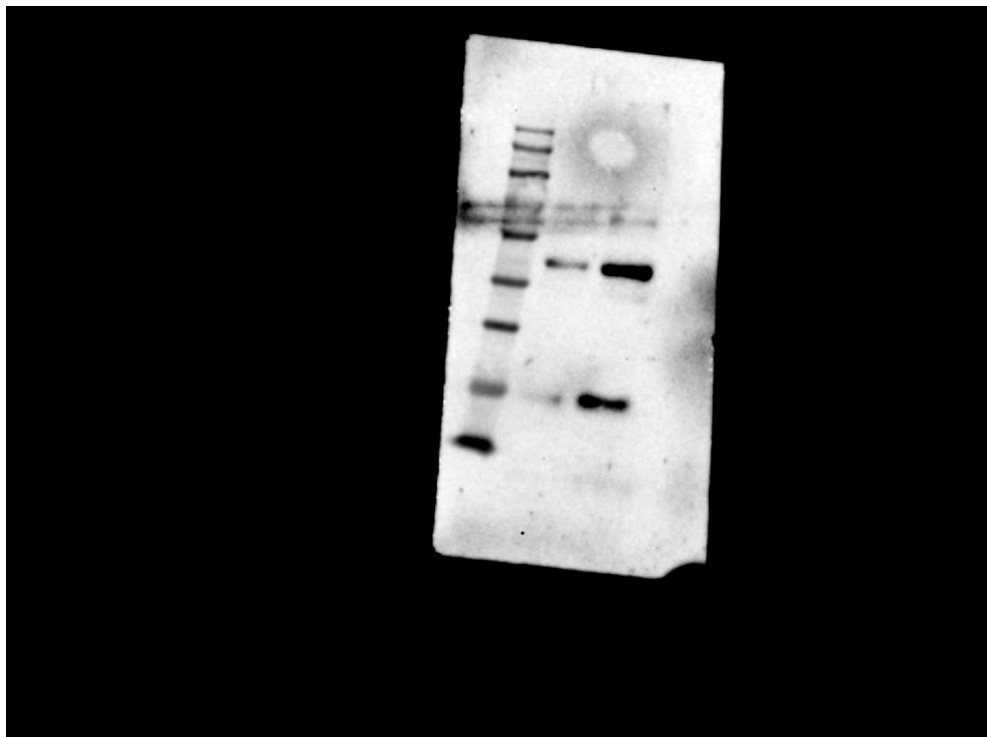

**Figure5C-1-2**

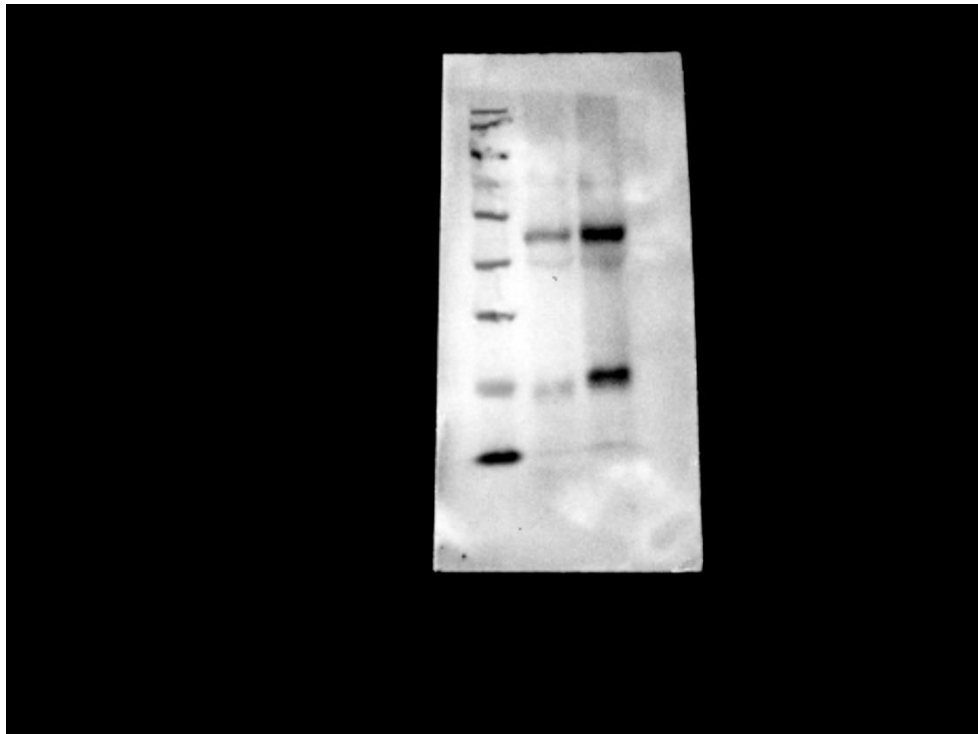

**Figure5C-1-3**

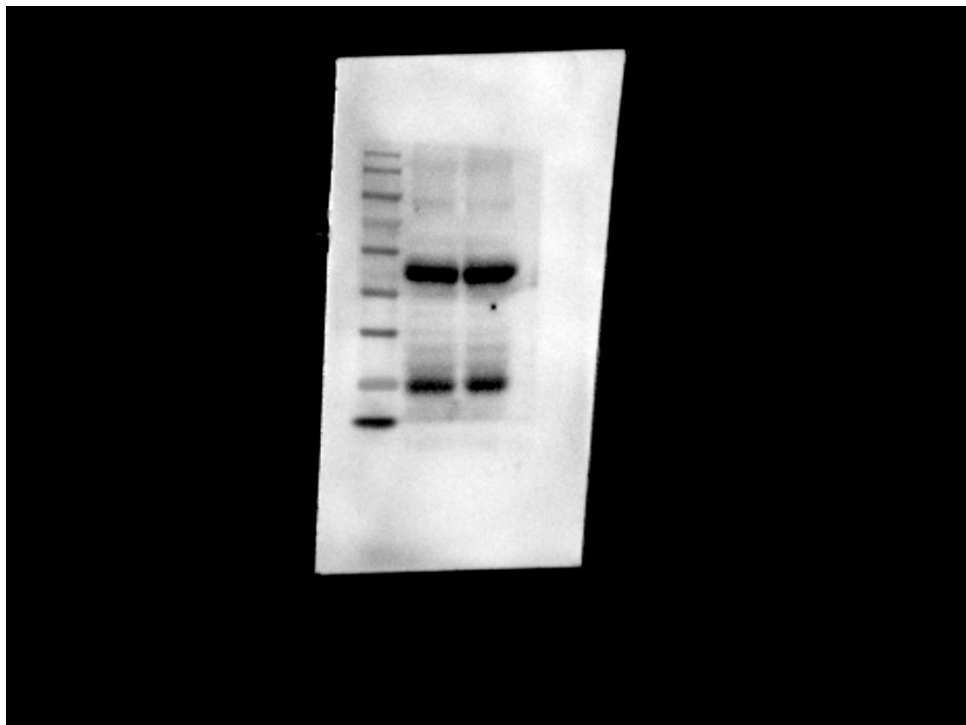

**Figure5C-1-4**

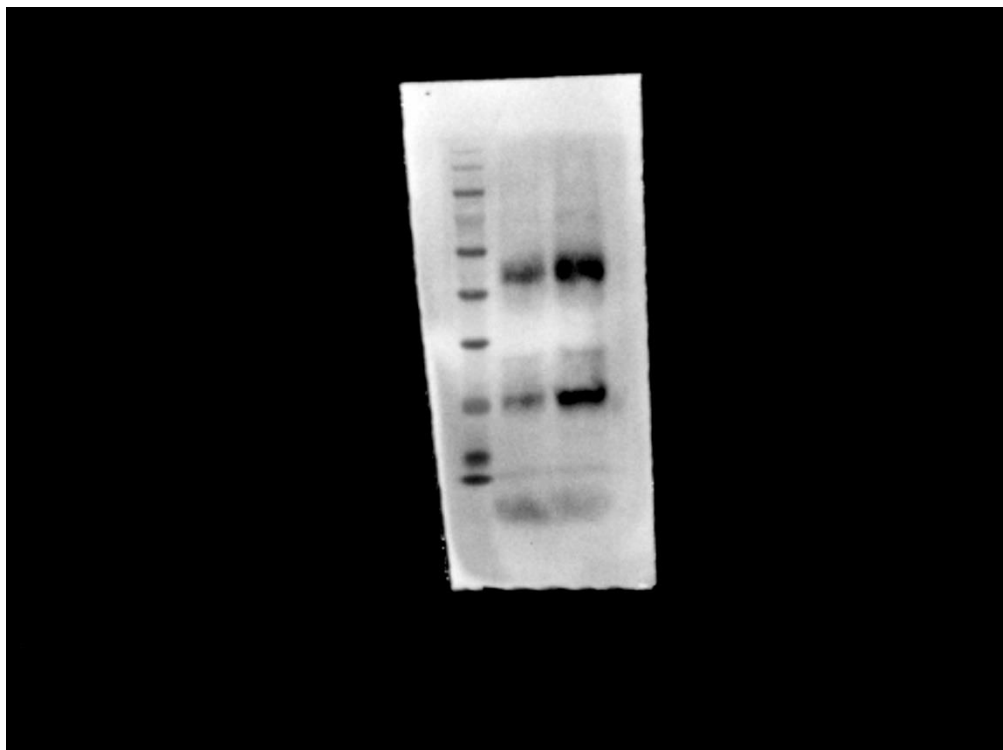

Figure5C-2-1

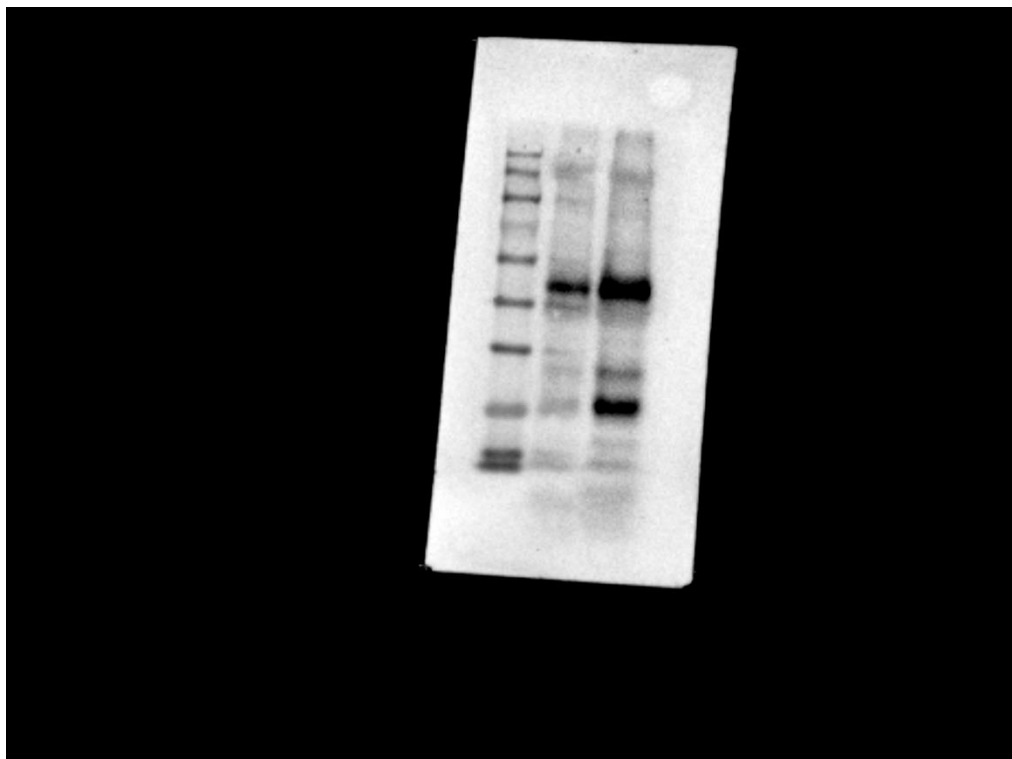

**Figure5C-2-2**

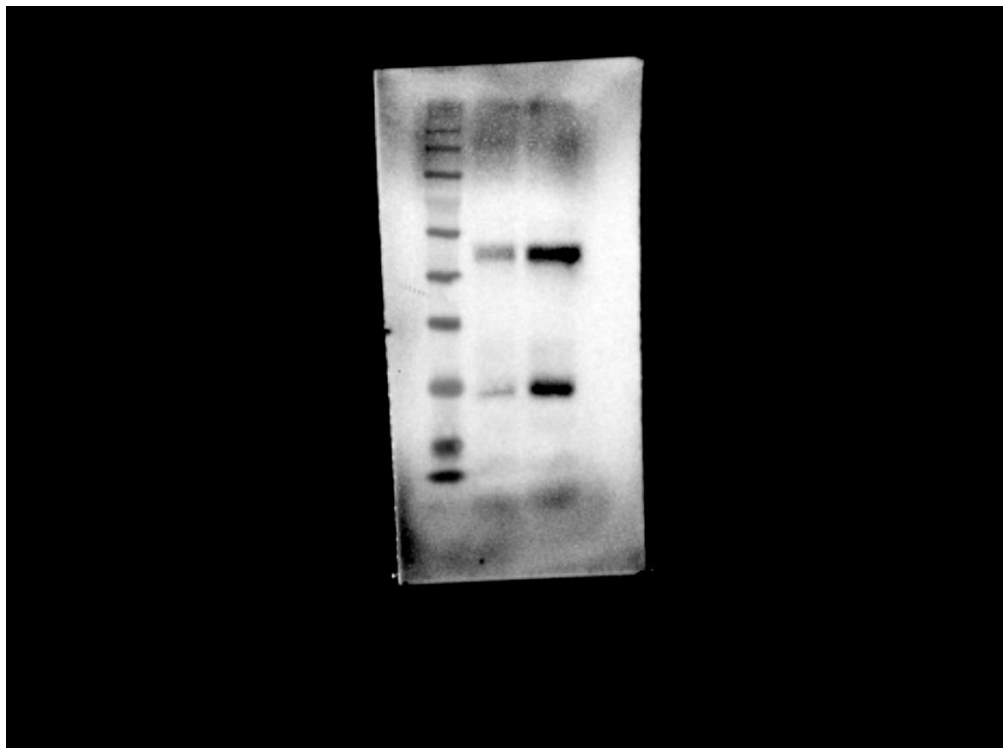

**Figure5C-2-3**

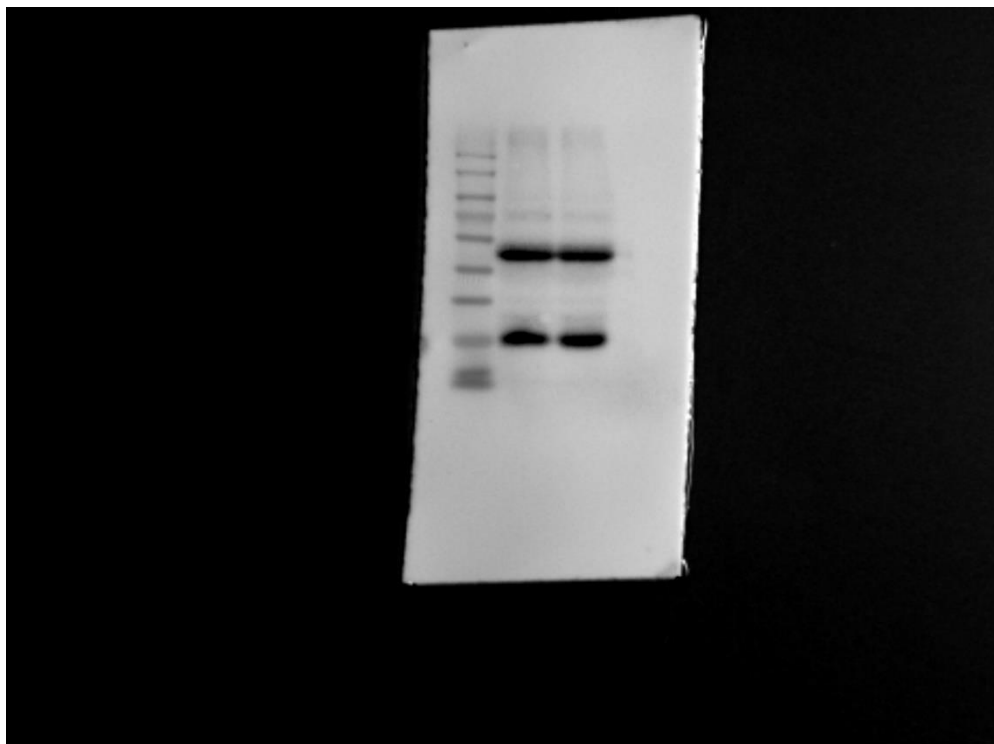

**Figure5C-2-4**
